# Supplementary material
Source: PubMed Central journal article supplement (PMC4767672)
Supplement: NIHMS754244-supplement-1.pdf [file NIHMS754244-supplement-1.pdf]

# Supplemental Information

## Contents

|          |                                                                             |            |
|----------|-----------------------------------------------------------------------------|------------|
| <b>1</b> | <b>Supplemental Experimental Procedures</b>                                 | <b>S2</b>  |
| 1.1      | Simulation model . . . . .                                                  | S2         |
| 1.1.1    | Diffusion of ribosomes and tRNAs . . . . .                                  | S3         |
| 1.1.2    | Translation initiation rates . . . . .                                      | S3         |
| 1.1.3    | Translation elongation rates . . . . .                                      | S3         |
| 1.1.4    | Translation termination . . . . .                                           | S4         |
| 1.1.5    | Estimating initiation probabilities using ribosome-profiling data . . . . . | S4         |
| 1.2      | Elongation arrest by cycloheximide . . . . .                                | S5         |
| 1.3      | Mapping ribosome profiling reads . . . . .                                  | S6         |
| 1.4      | Estimating tRNA abundances from RNA-seq . . . . .                           | S7         |
| 1.5      | Metagene analyses of ribosome and mRNA densities . . . . .                  | S8         |
| 1.6      | Comparing 5' and 3' codon-specific ribosome densities . . . . .             | S10        |
| 1.7      | Estimating codon-specific elongation times . . . . .                        | S10        |
| 1.8      | Estimating protein synthesis rates . . . . .                                | S11        |
| 1.8.1    | Ramp correction factor . . . . .                                            | S12        |
| 1.8.2    | Unbiased estimate of ribosome density per mRNA . . . . .                    | S13        |
| 1.8.3    | Initiation efficiency . . . . .                                             | S14        |
| 1.8.4    | Protein synthesis rates . . . . .                                           | S14        |
| <b>2</b> | <b>Supplemental Text</b>                                                    | <b>S16</b> |
| 2.1      | Co-translational folding and inter-domain linkers . . . . .                 | S16        |
| 2.2      | Widespread pauses after polybasic but not at proline residues . . . . .     | S16        |
| 2.3      | Contribution of translational control to proportional synthesis . . . . .   | S17        |
| 2.4      | Regression model . . . . .                                                  | S18        |

# 1 Supplemental Experimental Procedures

## 1.1 Simulation model

We use a whole-cell model of protein translation to simulate the dynamics of protein production (Shah et al., 2013). Briefly, the model assumes a fixed total number of ribosomes and tRNAs, and it describes how these entities initiate and elongate a fixed supply of mRNAs.

We define a genome with  $n = 4862$  genes, each with a prescribed coding sequence, and fixed mRNA abundance  $A_i$ . Gene  $i$  encodes an mRNA of length  $L_i$  codons and has a corresponding probability of translation initiation, denoted  $p_i$ , which is described below.

Each codon of type  $j$  is decoded by one of 41 iso-accepting tRNA species, denoted  $\phi(j)$ , which has a fixed total abundance  $T_{\phi(j)}^t$  in the cell. Each molecule of tRNA species  $\phi(j)$  is either free in the cell, or bound, along with a ribosome, to a codon of type  $j$  on an mRNA in the cell. Thus, the total number of tRNAs of type  $\phi(j)$  can be decomposed into those that are currently bound and those that are currently free:  $T_{\phi(j)}^t = T_{\phi(j)}^b + T_{\phi(j)}^f$ . Similarly, the total number of ribosomes,  $R^t$ , can be decomposed into bound and free:  $R^t = R^b + R^f$ . Moreover, the number of bound ribosomes always equals the total number of bound tRNAs of all species:  $R^b = \sum_{k=1}^{41} T_k^b$ .

Initiation and elongation events in the cell occur at rates that are determined by the current state of system (the number of free ribosomes, and the locations of all bound ribosomes) and by the underlying physical parameters of the cell. The underlying physical parameters are simply the volume of the cell, and the characteristic lengths and diffusion constants of ribosomes and tRNA molecules. The time between subsequent events are exponentially distributed, and Monte Carlo simulations proceed by incrementing time according to exponential deviates and re-computing rates of subsequent events (Gillespie, 1977).

### 1.1.1 Diffusion of ribosomes and tRNAs

In a cell of fixed volume, the average time required for any given molecule to move to one position, known as the characteristic time  $\tau$ , is given by

$$\tau = \frac{\lambda^2}{6D} \quad (\text{S1})$$

where  $D$  is the diffusion coefficient of the molecule and  $\lambda$  is its characteristic length. The characteristic times of tRNAs and ribosomes are  $\tau_t = 4.45 \times 10^{-7}$  s and  $\tau_r = 5 \times 10^{-4}$  s, respectively (Shah et al., 2013).

### 1.1.2 Translation initiation rates

Let  $\rho_i$  be the initiation rate at an mRNA of gene  $i$ . The rate  $\rho_i$  is set to zero if any of the first 10 codons of the mRNA is currently bound by a ribosome. Otherwise, the rate is

$$\rho_i = p_i \frac{R^f}{\tau_r N_r}. \quad (\text{S2})$$

The term  $\frac{R^f}{\tau_r N_r}$  in this equation denotes the rate at which free ribosomes ( $R^f$ ) diffuse to a given mRNA molecule. And the term  $p_i$  denotes the probability with which a ribosome will actually initiate translation of an mRNA molecule, once it has diffused to its 5' end. The parameters  $p_i$  allow us to account for sequence-specific variation in initiation rates among genes.

### 1.1.3 Translation elongation rates

Consider a ribosome bound at codon of type  $j$  at position  $k$  on an mRNA. Its elongation rate is set to zero if any of the following  $k + 10$  codons of the mRNA are currently occupied by another ribosome. Otherwise, the elongation rate depends on the number of free cognate tRNAs for that codon  $T_{\phi(j)}^f$  and the wobble parameter associated with the tRNA-codon pair  $w_j$ . If there is a perfect match between the tRNA and the codon, then  $w_j = 1$ . Else  $w_{ry/yr} = 0.64$  if the mismatch is due to a purine-pyrimidine wobble or  $w_{rr/yy} = 0.61$  if the mismatch is due to purine-purine or pyrimidine-pyrimidine wobble (Curran & Yarus, 1989; Lim & Curran, 2001). The elongation rate

is thus given by

$$\frac{T_{\phi(j)}^f w_j}{\tau_t N_t} \quad (\text{S3})$$

In addition, the time spent by a ribosome in selecting the cognate tRNA depends on the relative abundances of various competing tRNAs as well as organism specific kinetic rates associated with ribosomal proofreading. Using the method described in (Shah et al., 2013) we estimate the average time  $s$  spent by the ribosome in kinetic proofreading to select the correct tRNA. As a result, accounting for tRNA competition, the actual elongation rate of a codon is

$$\frac{T_{\phi(j)}^f w_j s}{\tau_t N_t} \quad (\text{S4})$$

#### 1.1.4 Translation termination

We assume that translation termination is an instantaneous event that occurs immediately after elongation of the last codon at position  $L$ . Upon termination the pool of free ribosomes and free tRNAs corresponding to the codon  $j'$  at position  $L - 1$  each increases by 1 ( $R^f \rightarrow R^f + 1$ ;  $T_{\phi(j)'}^f \rightarrow T_{\phi(j)'}^f + 1$ ).

#### 1.1.5 Estimating initiation probabilities using ribosome-profiling data

We use analytical approximation of the whole-cell simulation model (Shah et al., 2013) described above to estimate the gene-specific probability of translation initiation once a free ribosome reaches the 5' end of an mRNA. The gene-specific initiation probability  $p_i$  is given by Eqn. 27 in (Shah et al., 2013) as follows:

$$p_i \approx \frac{R_i^b x}{A_i L_i \left( \sum_{j=1}^{61} \frac{u_{j,i}}{w_j T_{\phi(j)}^t} \right)} \quad (\text{S5})$$

where

$$x = \frac{\tau_r N_r s}{0.15 R^t \tau_t N_t}$$

The term  $x$  depends on the bio-physical parameters of tRNAs, ribosomes and volume of an yeast cell, whose values are described above. The term  $\frac{R_i^b}{A_i L_i}$  describes the density of ribosome on an mRNA of gene  $i$  and is equivalent to the translation efficiency (TE) described as:

$$\text{TE} = \frac{\text{RPF RPKM}}{\text{mRNA RPKM}} \quad (\text{S6})$$

Thus we estimate the gene-specific initiation probability from ribosome profiling data by plugging in the experimentally determined TE ratios in Eqn. S5.

## 1.2 Elongation arrest by cycloheximide

In ribosome profiling experiments, ribosomes are often stabilized by addition of chemicals that arrest elongation to prevent run-offs during sample preparation. Cycloheximide (CHX) is usually the preferred elongation inhibitor (Ingolia et al., 2009; Zinshteyn & Gilbert, 2013; Brar et al., 2012; Gerashchenko et al., 2012; Artieri & Fraser, 2014b; McManus et al., 2014). However, it is unclear whether addition of CHX biases estimates of ribosome densities on mRNAs and hence subsequently affects inferences of protein translation dynamics based on these estimates. To explore how addition of CHX affects ribosome densities, we simulate protein translation in a cell by modeling the action of CHX.

CHX arrests ribosomes on mRNAs by binding with a tRNA in the E-site of the ribosome (Schneider-Poetsch et al., 2010). However, the E-site of a ribosome is almost always empty except for a short period immediately following an elongation and translocation event (Chen et al., 2011). As a result, upon addition of CHX to the cell, a recently elongated ribosome becomes a potential target for CHX. We model the action of CHX by assuming that whenever a ribosome elongates a codon, there is a constant probability with which CHX binds and arrests it. Assuming that the binding of CHX is a reversible process, we model CHX dissociation with a constant rate per bound CHX.

We begin by first simulating protein translation in a normal cell yeast till it reaches equilibrium (1500 sec). After this, whenever a ribosome at codon positions  $k$  of an mRNA elongates to  $k+1$ , the ribosome is arrested at  $k+1$  by CHX with constant probability  $p_{chx-on}$ . CHX dissociates from a

bound ribosome at with a constant rate  $r_{chx-off}$ . We vary the probability of CHX-binding  $p_{chx-on}$  and its dissociation rate  $r_{chx-off}$  to understand its effects on ribosome densities and dynamics of protein translation. We find that when CHX acts rapidly and has a low dissociation rate ( $p_{chx-on} = 0.2$ ,  $r_{chx-off} = 0.01$ ), we see peak excess relative ribosome-footprint density ( $e'_j$  Eqn S10) following the first ten codons is  $\sim 400\%$ , which is comparable to ramps observed in ribosome profiling experiments with CHX pre-treatment (Figure S1) but significantly higher than the ramp observed without CHX in both simulations ( $\sim 20\%$ ) and in the current study ( $\sim 60\%$ ). This suggests that a large ramp of ribosome densities in the 5' region is likely an artifact of the action of CHX (Gerashchenko & Gladyshev, 2014).

### 1.3 Mapping ribosome profiling reads

The *S. cerevisiae* reference genome sequence and transcript models were downloaded from Ensembl at [ftp://ftp.ensembl.org/pub/release-74/fasta/saccharomyces\\_cerevisiae/dna/](ftp://ftp.ensembl.org/pub/release-74/fasta/saccharomyces_cerevisiae/dna/) and [ftp://ftp.ensembl.org/pub/release-74/gtf/saccharomyces\\_cerevisiae/](ftp://ftp.ensembl.org/pub/release-74/gtf/saccharomyces_cerevisiae/).

Data was processed using a framework written in Python. Reads were trimmed from the right of adapter sequences according to the specific library preparations used to generate each data set: reads from poly-adenylated libraries were trimmed of all trailing As, and reads from libraries prepared with a pre-adenylated linker (either 'CTGTAGGCACCATCAAT' or 'TCGTATGCCGTCTTCTGCTTG') were trimmed to the first position from the left at which the next 10 bases in the read were within a hamming distance of 1 from the first 10 bases of the linker sequence or to where a suffix of the read exactly matched a prefix of the linker sequence. For our data, 8 nt of randomized barcode sequence was trimmed from the left of each read and appended to the read's name. Reads originating from ribosomal RNAs were pre-filtered by mapping to an index of yeast rRNA sequences with bowtie2 version 2.2.1. Filtered reads were then mapped to the yeast genome and spliced transcript models using tophat2 v2.0.9. Reads mapping to any tRNA or other noncoding RNA genes were discarded. For each annotated coding sequence, counts of the number of uniquely mapped reads on the sense strand whose 5'-most mapped base occupied every position from 50 nt upstream of the start codon to 50 nt downstream of the stop codon were calculated. To

calculate codon occupancies, only trimmed reads of length 28, 29 and 30 (for which the identity of the codon occupying the A-site of the ribosome could be most reliably inferred) were used. Reads of length 28 and 29 were assigned to the codon at position +14, 15, or 16 from the start of the read, and reads of length 30 were assigned to the codon at position +15, 16, or 17. To calculate read densities, reads of all lengths were included.

Data sources: (GSE\* indicates GEO accession number)

Flash-freeze: GSE75897

Ingolia: GSE13750 (Ingolia et al., 2009)

Zinshteyn: GSE45366 (Zinshteyn & Gilbert, 2013)

Gerashchenko: personal communication with Maxim Gerashchenko (Gerashchenko et al., 2012)

Artieri: GSE50049 (Artieri & Fraser, 2014b)

Mcmanus: GSE52119 (McManus et al., 2014)

Guydosh: GSE52968 (Guydosh & Green, 2014)

Lareau: GSE58321 (Lareau et al., 2014)

Gardin: SRP044053 (Gardin et al., 2014)

Pop: GSE63789 (Pop et al., 2014)

Jan: GSE61012 (Jan et al., 2014)

Williams: GSE61011 (Williams et al., 2014)

Nedialkova: GSE67387 (Nedialkova & Leidel, 2015)

#### 1.4 Estimating tRNA abundances from RNA-seq

To estimate tRNA abundances, RNA-seq reads from the Ribo-Zero-treated sample were mapped to annotated *S. cerevisiae* tRNA loci (downloaded from Ensembl) using **Bowtie**, allowing up to one mismatch and sampling alignments for multiply mapping reads (options `-n 1 -l 25 -e 100 -M 1 --best --strata`). The total number of reads corresponding to each tRNA anticodon were tallied, and wobble parameters were used to estimate cognate tRNA abundances for individual codons.

## 1.5 Metagene analyses of ribosome and mRNA densities

To understand how ribosome and mRNA densities vary along the length of a transcript, we estimate position-specific ribosome densities of individual genes into a composite metagene. Let  $x_{i,j}$  be the number of mapped RPF reads to position  $j$  of gene  $i$  based on its A-site. In order to avoid biases induced due genes with low coverage of reads, we restricted our analyses to genes with at least 128 mapped total mapped reads. To account for differences in initiation rates between different genes, we calculate the normalized ribosome density  $z_{i,j}$  at codon position  $j$  by normalizing the mapped reads at that codon by the mean number of mapped reads in that gene.

$$z_{i,j} = \frac{x_{i,j}}{(\sum_{j=1}^{L_i} x_{i,j})/L_i} \quad (\text{S7})$$

$L_i$  = Length of gene  $i$  in codons

We calculate the excess ribosome densities  $e_j$  at a particular position  $j$  by averaging the normalized ribosome density  $z_{i,j}$  across all genes whose length is at least  $j$  ( $L_i \leq j$ ).

$$e_j = \frac{\sum_{i=1}^N z_{i,j}}{\sum_{i=1}^N \delta_i(j)} \quad (\text{S8})$$

$$\delta_i(j) = \begin{cases} 1 & \text{if } L_i \geq j \\ 0 & \text{if } L_i < j \end{cases} \quad (\text{S9})$$

$N$  = Number of genes

The amount of excess ribosome densities  $e_j$  at the 5' ends of genes vary with each dataset. As a result, the excess ribosome densities asymptote at different values depending on the dataset, making it harder to compare the peaks of ribosome densities across datasets. To account for these differences, we estimated relative excess densities  $e'_j$  by normalizing excess ribosome-densities  $e_j$  with excess ribosome densities in the region spanning 450 and 500 codons. This region was chosen based on the observation that excess ribosome densities in all ribosome profiling dataset reach an



asymptote around 450-500 codons. The relative excess ribosome densities  $e'_j$  were calculated as follows:

$$e'_j = \frac{e_j}{(\sum_{j=450}^{500} e_j)/51} \quad (\text{S10})$$

We report peak excess ribosome densities as the maximum of  $e'_j$  in a region spanning 10 to 500 codons. We ignore the first few codons as they are highly variable and result in sharp peaks due to continued initiation events.

We calculate excess mRNA coverage at each nucleotide position  $j$  similar to excess RPF reads described above. Let  $y_{i,j}$  be the number of times mRNA reads overlapped position  $j$  of gene  $i$ . The normalized mRNA coverage at  $g_{i,j}$  at nucleotide position  $j$  is obtained by normalizing the coverage at that nucleotide by the mean coverage of all nucleotides in that ORF.

$$g_{i,j} = \frac{y_{i,j}}{(\sum_{j=1}^{L'_i} y_{i,j})/L'_i} \quad (\text{S11})$$

$$L'_i = \text{Length of gene } i \text{ in nucleotides}$$

We calculate the excess mRNA coverage  $h_j$  at a particular position  $j$  by averaging the normalized mRNA coverage  $g_{i,j}$  across all genes whose length is at least  $j$  ( $L'_i \leq j$ ).

$$h_j = \frac{\sum_{i=1}^N g_{i,j}}{\sum_{i=1}^N \delta_i(j)} \quad (\text{S12})$$

$$\delta_i(j) = \begin{cases} 1 & \text{if } L'_i \geq j \\ 0 & \text{if } L'_i < j \end{cases} \quad (\text{S13})$$

The relative excess mRNA coverage  $h'_j$  based on 1350-1500 nucleotides were calculated as follows:

$$h'_j = \frac{h_j}{(\sum_{j=1350}^{1500} h_j)/151} \quad (\text{S14})$$

To estimate the degree of bias in mRNA measurements in the 3' ends of genes, we scale excess

mRNA coverage at a nucleotide  $j$  by 1350-1500 nucleotides from the stop codon as follows:

$$h_j'' = \frac{h_j}{(\sum_{j=L'_m-1350}^{L'_m-1500} h_j)/151} \quad (\text{S15})$$

$L'_m = \text{Max length of genes in nucleotides}$

## 1.6 Comparing 5' and 3' codon-specific ribosome densities

To estimate codon-specific ribosome densities in the 5' and 3' ends of genes, we begin by first calculating normalized ribosome densities within a gene  $z_{i,j}$  (Eqn. S7) for all genes with at least 250 codons. Normalizing ribosome-densities within a gene removes the effect of differences in initiation rates among genes when comparing normalized reads across many genes. The average ribosome density of all ribosome reads at codon type  $k$  in the 5' ( $v_k^{5'}$ ) and 3' ( $v_k^{3'}$ ) ends across the genome is then given by

$$v_k^{5'} = \frac{\sum_{i=1}^N \sum_{j=1 \forall c(i,j)=k}^{200} z_{i,j}}{\sum_{i=1}^N n_{i,k}^{5'}} \quad (\text{S16})$$

$$v_k^{3'} = \frac{\sum_{i=1}^N \sum_{j=201 \forall c(i,j)=k}^{L_i} z_{i,j}}{\sum_{i=1}^N n_{i,k}^{3'}} \quad (\text{S17})$$

$n_{i,k}^{5'}$  = Number of codons of type  $k$  in gene  $i$  in codons  $1 \leq j \leq 200$

$n_{i,k}^{3'}$  = Number of codons of type  $k$  in gene  $i$  in codons  $201 \leq j \leq L_i$

$c(i, j)$  = Identity of codon at position  $j$  of gene  $i$

## 1.7 Estimating codon-specific elongation times

Most theoretical studies of protein translation assume a negative relationship between the elongation time of a codon and its tRNA abundance. To test this, we estimate codon-specific elongation times from ribosome densities as follows:

In order to avoid the confounding effects of 5' ribosomal ramp on our estimates of codon-specific ribosome densities, we restrict our analyses to genes with at least 250 codons and only consider

RPF reads mapped from codon position 200 onwards. Let  $x_{i,j}$  be the number of mapped RPF reads to position  $j$  of gene  $i$ . The normalized ribosome density  $z'_{i,j}$  at codon position  $j \geq 200$  is given by normalizing the mapped reads at that codon by the mean number of mapped reads from codon position 200 to  $L_i$ .

$$z'_{i,j} = \begin{cases} \frac{x_{i,j}}{(\sum_{j=200}^{L_i} x_{i,j}) / (L_i - 199)} & \text{if } j \geq 200 \\ \text{NA} & \text{if } j < 200 \end{cases} \quad (\text{S18})$$

Normalizing ribosome-densities within a gene removes the effect of differences in initiation rates among genes when comparing normalized reads across many genes. The average ribosome density of all ribosome reads at codon type  $k$  ( $v_k$ ) across the genome is then given by

$$v_k = \frac{\sum_{i=1}^N \sum_{j=200}^{L_i} \mathbb{1}_{c(i,j)=k} z'_{i,j}}{\sum_{i=1}^N n_{i,k}} \quad (\text{S19})$$

$n_{i,k}$  = Number of codons of type  $k$  in gene  $i$  in codons  $200 \leq j \leq L_i$

$c(i, j)$  = Identity of codon at position  $j$  of gene  $i$

The expected elongation time of a codon is then directly proportional to average codon-specific ribosome density,  $v_k$  because codons with longer elongation times have higher average ribosome densities.

## 1.8 Estimating protein synthesis rates

We estimate protein synthesis rates of individual genes using the densities of ribosomes on their mRNAs. However, the ribosome densities per mRNA as estimated by taking ratios of RPF RPKM and mRNA RPKM are likely biased. The main source of this bias is the presence of a 5' ramp of RPF reads that varies with position along a transcript.

### 1.8.1 Ramp correction factor

In order to obtain unbiased estimates of gene-specific ribosome-densities, we apply a position-dependent correction factor to RPF reads that accounts for the ramp. However, the observed ramp of ribosome densities is partly a result of codon ordering within genes in addition to experimental artifacts. Our position-dependent correction factor accounts for the ribosomal ramp due to experimental artifacts by explicitly taking into account the contribution of codon usage dependent ramp.

The total excess ribosome density at a position  $j$  across all gene is given by  $e_j$  (see above, Eqn. S8). To calculate the expected excess ribosome density at a position  $j$  due to codon ordering within a gene, we first calculate average ribosome density for codon  $k$ ,  $v_k$  as described above (Eqn. S19). The expected excess ribosome density  $d_j$  at position  $j$  due to patterns of codon usage is given as follows:

The relative codon-usage expected ribosome density  $q_{i,j}$  at position  $j$  of gene  $i$  is given by normalizing the expected ribosome density  $v_{c(i,j)}$  at that codon by the mean expected ribosome density for that gene.

$$q_{i,j} = \frac{v_{c(i,j)}}{(\sum_{j=1}^{L_i} v_{c(i,j)})/L_i} \quad (\text{S20})$$

$L_i$  = Length of gene  $i$  in codons

$c(i, j)$  = Identity of codon at position  $j$  of gene  $i$

The average codon-usage expected ribosome density at position  $j$  ( $d_j$ ) across the genome is then given by

$$d_j = \frac{\sum_{i=1}^N q_{i,j}}{\sum_{i=1}^N \delta_i(j)} \quad (\text{S21})$$

$$\delta_i(j) = \begin{cases} 1 & \text{if } L_i \geq j \\ 0 & \text{if } L_i < j \end{cases} \quad (\text{S22})$$

The ramp correction factor  $f_j$  at position  $j$  along any gene is then defined as the ratio of observed ramp  $e_j$  over the expected ramp  $d_j$ .

$$f_j = \frac{e_j}{d_j} \quad (\text{S23})$$

### 1.8.2 Unbiased estimate of ribosome density per mRNA

Let  $x_{i,j}$  be the number of mapped RPF reads and  $y_{i,j}$  be the number of mapped mRNA reads to position  $j$  of gene  $i$ . The unbiased estimate of ribosome density  $r_i$  per mRNA for gene  $i$  is defined as

$$\text{Mean corrected RPF reads} = \frac{\sum_{j=1}^{L_i} \frac{x_{i,j}}{f_j}}{L_i} \quad (\text{S24})$$

$$\text{Mean mRNA reads} = \frac{\sum_{j=1}^{L_i} y_{i,j}}{L_i} \quad (\text{S25})$$

$$\begin{aligned} r_i &= \frac{\text{Mean corrected RPF reads}}{\text{Mean mRNA reads}} \\ &= \frac{\sum_{j=1}^{L_i} \frac{x_{i,j}}{f_j}}{\sum_{j=1}^{L_i} y_{i,j}} \end{aligned} \quad (\text{S26})$$

where  $f_j$  is the ramp correction factor (see above, Eqn. S23).

### 1.8.3 Initiation efficiency

We estimate initiation efficiency of a genes using the analytic approximations for the initiation probability  $p_i$  based on steady-state behavior of a whole cell simulation described above (Eqn. S5).

$$p_i \approx \frac{R_i^b x}{A_i L_i \left( \sum_{j=1}^{61} \frac{u_{j,i}}{w_j T_{\phi(j)}^t} \right)}$$

where

$$x = \frac{\tau_r N_r s}{0.15 R^t \tau_t N_t}$$

see Methods (1. Simulation model section) above for details on parameter notations and values.  $\frac{R_i^b}{A_i L_i}$  describes the ribosome density per mRNA on gene  $i$ . Here we substitute  $\frac{R_i^b}{A_i L_i}$  with unbiased estimates of ribosome density per mRNA  $r_i$  (Eqn. S26) in Eqn. S5. Moreover, estimates of codon-specific ribosome densities  $v_k$  (Eqn. S19) reflect average elongation times of codons – codons with longer elongation times have higher ribosome densities. Therefore, we substitute expected elongation time of a codon given by  $\frac{1}{w_j T_{\phi(j)}^t}$  in Eqn. S5 with estimates of codon-specific ribosome densities  $v_k$ . As a result, our initiation efficiency  $p_i^E$  for gene  $i$  is estimated solely from ribosome profiling data and is defined as

$$p_i^E \approx \frac{r_i x G}{\sum_{j=1}^{61} u_{j,i} v_k} \quad (\text{S27})$$

where  $G$  is the global scaling parameter, which scales  $r_i$  such that the total number of ribosomes within a cell are 200,000, total number of mRNAs are 60,000 and total number of tRNAs are 3,300,000 based on empirical estimates (Shah et al., 2013).

### 1.8.4 Protein synthesis rates

Protein synthesis rate  $S_i$  of a gene  $i$  within a cell depend on total number of mRNAs for that gene ( $A_i$ ) and initiation rate per mRNA ( $\rho_i$  Eqn. S2) and the number of free ribosomes. Here we modify Eqn. S2) by substituting initiation probabilities ( $p_i$ ) with estimates of initiation efficiencies ( $p_i^E$ )

based on profiling data (Eqn. S27).

$$S_i = p_i^E A_i \frac{R^f}{\tau_r N_r} \quad (\text{S28})$$

In estimating  $S_i$ , we assume that 15% of the total 200,000 ribosomes are free and the rest are bound to mRNAs, such that  $R^f = 3 \times 10^4$ . Furthermore, we scale mRNA abundances as measured by mRNA RPKM such that the total number of mRNAs are 60,000 ( $\sum_i A_i = 6 \times 10^4$ ).

## 2 Supplemental Text

### 2.1 Co-translational folding and inter-domain linkers

During protein translation, a growing polypeptide chain begins to fold as soon as it emerges from the ribosome - a process known as co-translational folding. Several studies have suggested that pausing of ribosome at specific instances is necessary for the nascent polypeptide to take native-like folds (Kimchi-Sarfaty et al., 2007; Pechmann & Frydman, 2013). If ribosomal pausing significantly affects co-translation folding, then we expect a higher density of ribosomes in regions between protein domains. To test this, we downloaded domain assignments for individual genes in the *S. cerevisiae* genome from SGD – [http://downloads.yeastgenome.org/curation/calculated\\_protein\\_info/domains/domains.tab](http://downloads.yeastgenome.org/curation/calculated_protein_info/domains/domains.tab) based on InterProScan <http://www.ebi.ac.uk/interpro> on Jan 14, 2014. Domain assignments were based on InterProScan classifications (Jones et al., 2014) obtained from the Superfamily database (Wilson et al., 2009) and Pfam database.

### 2.2 Widespread pauses after polybasic but not at proline residues

Aside from the abundance of cognate tRNA, the ribosome-footprint density at a particular codon in an ORF might also be influenced by interactions between the emerging nascent polypeptide and the ribosome. Indeed, extensive polybasic tracts can stall translation, presumably because of electrostatic interactions between the nascent polypeptide and the negatively charged exit tunnel (Lu & Deutsch, 2008; Tuller et al., 2011; Brandman et al., 2012; Charneski & Hurst, 2013). However, the relationship between polybasic tracts and ribosome densities has been the subject of some debate (Charneski & Hurst, 2013; Artieri & Fraser, 2014a). To help resolve this issue, we estimated excess ribosome-footprint densities ( $z_{i,j}$ , Eqn. S7) in windows of 10 amino acids with varying number of positively charged residues. We observed a sharp peak of ribosome density at the end of highly positively charged regions (defined as six arginine or lysine residues within a 10 amino-acid window), which would position the basic residues within the exit tunnel (Figure S3). The pause amplitude steadily decreased as the number of basic residues within the window decreased, but pausing was still apparent with as few as three basic residues within the 10-amino-acid window.



Our results on pausing resembled the findings of other recent studies (Lu & Deutsch, 2008; Tuller et al., 2011; Brandman et al., 2012; Charneski & Hurst, 2013). However, this pausing signal was absent in every ribosome-profiling dataset with CHX pre-treatment (Figure S3), whereas it was present in six of eight datasets without CHX pre-treatment, which provides further evidence that drug treatment obscures the locations of natural elongation pauses. When simulating ribosome densities surrounding polybasic stretches in our whole-cell model, we found a relative depletion of ribosomes in polybasic stretches (Figure S3N), which indicates that elongation stalls within polybasic stretches were not caused by biased codon usage and that the observed excess ribosome-footprint density likely underestimated the direct effect of polybasic stretches on elongation rates.

Previous studies have also reported an excess of elongating ribosomes at sites where a proline amino acid is positioned in the P site of the ribosome (Artieri & Fraser, 2014a; Martens et al., 2015). This increased density is attributed to the difficulty of forming a peptide bond between the incoming amino acid in the A site and proline in the P site. When we looked for excess ribosome density at P-site proline codons, we also observed a strong accumulation of ribosomes in datasets that used CHX pre-treatment (Figure S2). However, this stall at P-site prolines was not observed in either our flash-freeze dataset or most other published flash-freeze datasets (Figure S2). Thus, most (if not all) of the excess ribosome density previously observed at P-site proline codons can be attributed to the effects of CHX pre-treatment.

### **2.3 Contribution of translational control to proportional synthesis**

Although narrower than reported in earlier ribosome-profiling studies, the IE distribution that we observed was still large enough to enable the cell to tune synthesis rates via translational control. One scenario in which this might be important is in the proportional synthesis of the subunits for multi-protein complexes. A recent genome-wide study of protein-synthesis rates in *E. coli* and *S. cerevisiae* concluded that components of multi-subunit complexes are usually synthesized in precise proportion to their stoichiometry (Li et al., 2014). In *E. coli*, the subunits of multi-protein complexes are usually encoded on the same polycistronic mRNA and thus can be synthesized in different proportions only if they have different translation-initiation rates. In eukaryotes, however,

the subunits of protein complexes are encoded on separate mRNAs, which enables proportional synthesis to be achieved through control of mRNA abundance (via transcription rate and mRNA half-life). Nonetheless, translational control might still compensate for differences in mRNA abundance and thereby achieve more precise stoichiometry of synthesis rates. To explore this possibility, we examined the synthesis rates, mRNA abundances, and IEs of the subunits of stably associated complexes previously shown to undergo proportional synthesis (Li et al., 2014). mRNAs encoding subunits of heterodimeric complexes had roughly similar abundances (within 2 fold), indicating that most of their proportional synthesis is achieved through coordinated mRNA levels (Figure S6D). The same was true for mRNAs encoding multi-protein complexes, after accounting for subunit stoichiometry (within  $\approx 2$  fold, Figure S6E), as well for mRNAs encoding heterodimeric complexes containing alternative paralogous subunits (within 1.4 fold, Figure S6F). These observations were consistent with the narrow range of IEs in yeast; with limited translational control, proportional synthesis requires roughly proportional mRNA levels. However, in 12 out of 18 cases subunit stoichiometry was more accurately reflected by synthesis rates than by mRNA abundances (Figures S6E-G), as quantified by the coefficients of variation (Figure S6G). For example, the subunits of the heterodimeric FACT complex were translated at equal levels even though Spt16-encoding mRNA was 59% more abundant than the Pob3-encoding mRNA. Similarly, in the mitochondrial *alpha*-ketoglutarate dehydrogenase complex, higher expression of the Kdg2 subunit relative to the Kdg1 subunit (which have 2:1 stoichiometry in the complex) was achieved entirely at the level of translation. We also found that mRNAs encoding proportionally synthesized subunits of heterodimeric complexes tended to have similar IEs ( $R^2 = 0.72$ , Figure S6D), suggesting that such mRNAs might be coregulated at the level of translation. Collectively, these results suggest a tendency for translational control to compensate for small differences in mRNA levels to help achieve more proportional synthesis.

## 2.4 Regression model

Initiation efficiency ( $p^E$ ) of a gene depends on several features of a coding sequence. In order to identify a set of features that explain the most variation in  $p^E$ , we use the multiple regression

framework in R (R Core Team, 2012). We regressed the  $p^E$  of a gene against its length, mRNA abundance (RPKM), 5' UTR length and its GC content, 5' cap folding energy, and number of upstream ATGs in 5' UTR (uATG). We restricted the analyses to 2549 genes with experimentally verified 5' UTR lengths and number of upstream ATGs (Arribere & Gilbert, 2013). To estimate 5' cap folding energy we used sequences of length 70 nts from the 5' end of the mRNA transcript as sequences of these lengths showed the highest correlation with TE ratios (Figure S7). We calculated the folding energies using RNAfold algorithm from Vienna RNA package (Hofacker et al., 1994) at 37 °C. The values of  $p^E$ , mRNA RPKM and protein length were log-transformed in the regression model.

To identify which features explain the highest amount of variation in initiation efficiencies, we used Akaike's Information Criteria (AIC) for model selection. We performed both step-up and step-down model selection using the `stepAIC` function in `MASS` package in R. We find that the multiple regression model that best explains the variation in  $p^E$  even after penalizing for model complexity includes all the 6 variables considered (Table S6). This model explains  $\sim 58\%$  of variation in  $p^E$  across all the genes considered. We find that initiation efficiencies scale positively with predicted folding energies and mRNA abundances. This indicates that genes with weaker 5' cap structure and RNA structure around the start site have higher rates of initiation. In contrast, genes with a higher number of uATGs and longer 5' UTRs and coding sequence length have lower  $p^E$ . Moreover, genes that have higher mRNA abundances also tend to have higher  $p^E$  and hence higher ribosome densities (TE) on them. This suggests that genes under selection for higher protein abundances are selected both at the level of transcription – leading to higher mRNA abundances and at the translation level – leading to higher ribosome densities.

## Supplemental References

- Arribere, J. A. & Gilbert, W. V. (2013). Roles for transcript leaders in translation and mRNA decay revealed by transcript leader sequencing. *Genome Res*, 23(6), 977–987.
- Artieri, C. G. & Fraser, H. B. (2014a). Accounting for biases in riboprofiling data indicates a major role for proline in stalling translation. *Genome Res*, 24(12), 2011–2021.
- Artieri, C. G. & Fraser, H. B. (2014b). Evolution at two levels of gene expression in yeast. *Genome Res*, 24(3), 411–421.
- Brandman, O., Stewart-Ornstein, J., Wong, D., Larson, A., Williams, C. C., Li, G.-W., Zhou, S., King, D., Shen, P. S., Weibezahn, J., Dunn, J. G., Rouskin, S., Inada, T., Frost, A., & Weissman, J. S. (2012). A ribosome-bound quality control complex triggers degradation of nascent peptides and signals translation stress. *Cell*, 151(5), 1042–1054.
- Brar, G. A., Yassour, M., Friedman, N., Regev, A., Ingolia, N. T., & Weissman, J. S. (2012). High-resolution view of the yeast meiotic program revealed by ribosome profiling. *Science*, 335(6068), 552–557.
- Charneski, C. A. & Hurst, L. D. (2013). Positively charged residues are the major determinants of ribosomal velocity. *PLoS Biol*, 11(3), e1001508.
- Chen, C., Stevens, B., Kaur, J., Smilansky, Z., Cooperman, B. S., & Goldman, Y. E. (2011). Allosteric vs. spontaneous exit-site (E-site) tRNA dissociation early in protein synthesis. *Proc Natl Acad Sci USA*, 108(41), 16980–16985.
- Curran, J. F. & Yarus, M. (1989). Rates of aminoacyl-tRNA selection at 29 sense codons in vivo. *J Mol Biol*, 209(1), 65–77.
- Gardin, J., Yeasmin, R., Yurovsky, A., Cai, Y., Skiena, S., & Futcher, B. (2014). Measurement of average decoding rates of the 61 sense codons in vivo. *eLife*, 3.
- Gerashchenko, M. V. & Gladyshev, V. N. (2014). Translation inhibitors cause abnormalities in ribosome profiling experiments. *Nucl Acids Res*, 42(17), e134–e134.

- Gerashchenko, M. V., Lobanov, A. V., & Gladyshev, V. N. (2012). Genome-wide ribosome profiling reveals complex translational regulation in response to oxidative stress. *Proc Natl Acad Sci USA*, 109(43), 17394–17399.
- Gillespie, D. (1977). Exact stochastic simulation of coupled chemical reactions. *The journal of physical chemistry*, 81(25), 2340–2361.
- Guydosh, N. R. & Green, R. (2014). Dom34 rescues ribosomes in 3' untranslated regions. *Cell*, 156(5), 950–962.
- Hofacker, I. L., Fontana, W., & Stadler, P. (1994). Fast folding and comparison of RNA secondary structures. *Monatshefte für Chemie*, 125, 167–188.
- Ingolia, N. T., Ghaemmaghami, S., Newman, J. R. S., & Weissman, J. S. (2009). Genome-Wide Analysis in Vivo of Translation with Nucleotide Resolution Using Ribosome Profiling. *Science*, 324(5924), 218–223.
- Jan, C. H., Williams, C. C., & Weissman, J. S. (2014). Principles of ER cotranslational translocation revealed by proximity-specific ribosome profiling. *Science*, 346(6210), 1257521.
- Jones, P., Binns, D., Chang, H. Y., Fraser, M., Li, W., McAnulla, C., McWilliam, H., Maslen, J., Mitchell, A., Nuka, G., Pesseat, S., Quinn, A. F., Sangrador-Vegas, A., Scheremetjew, M., Yong, S. Y., Lopez, R., & Hunter, S. (2014). InterProScan 5: genome-scale protein function classification. *Bioinformatics*, 30(9), 1236–1240.
- Kimchi-Sarfaty, C., Oh, J. M., Kim, I.-W., Sauna, Z. E., Calcagno, A. M., Ambudkar, S. V., & Gottesman, M. M. (2007). A "silent" polymorphism in the MDR1 gene changes substrate specificity. *Science*, 315(5811), 525–528.
- Lareau, L. F., Hite, D. H., Hogan, G. J., & Brown, P. O. (2014). Distinct stages of the translation elongation cycle revealed by sequencing ribosome-protected mRNA fragments. *eLife*, 3, e01257.
- Li, G.-W., Burkhardt, D., Gross, C., & Weissman, J. S. (2014). Quantifying absolute protein synthesis rates reveals principles underlying allocation of cellular resources. *Cell*, 157(3), 624–635.

- Lim, V. I. & Curran, J. F. (2001). Analysis of codon:anticodon interactions within the ribosome provides new insights into codon reading and the genetic code structure. *RNA*, 7(7), 942–957.
- Lu, J. & Deutsch, C. (2008). Electrostatics in the ribosomal tunnel modulate chain elongation rates. *J Mol Biol*, 384(1), 73–86.
- Martens, A. T., Taylor, J., & Hilser, V. J. (2015). Ribosome A and P sites revealed by length analysis of ribosome profiling data. *Nucl Acids Res*, 43(7), 3680–3687.
- McManus, C. J., May, G. E., Spealman, P., & Shteyman, A. (2014). Ribosome profiling reveals post-transcriptional buffering of divergent gene expression in yeast. *Genome Res*, 24(3), 422–430.
- Nedialkova, D. D. & Leidel, S. A. (2015). Optimization of Codon Translation Rates via tRNA Modifications Maintains Proteome Integrity. *Cell*, 161(7), 1606–1618.
- Pechmann, S. & Frydman, J. (2013). Evolutionary conservation of codon optimality reveals hidden signatures of cotranslational folding. *Nat Struct Mol Biol*, 20(2), 237–243.
- Pop, C., Rouskin, S., Ingolia, N. T., Han, L., Phizicky, E. M., Weissman, J. S., & Koller, D. (2014). Causal signals between codon bias, mRNA structure, and the efficiency of translation and elongation. *Mol Syst Biol*, 10(12), 770–770.
- R Core Team (2012). R: A language and environment for statistical computing. *R foundation for Statistical Computing*.
- Schneider-Poetsch, T., Ju, J., Eyler, D. E., Dang, Y., Bhat, S., Merrick, W. C., Green, R., Shen, B., & Liu, J. O. (2010). Inhibition of eukaryotic translation elongation by cycloheximide and lactimidomycin. *Nat Chem Biol*, 6(3), 209–217.
- Shah, P., Ding, Y., Niemczyk, M., Kudla, G., & Plotkin, J. B. (2013). Rate-limiting steps in yeast protein translation. *Cell*, 153(7), 1589–1601.
- Tuller, T., Veksler-Lublinsky, I., Gazit, N., Kupiec, M., Ruppin, E., & Ziv-Ukelson, M. (2011). Composite effects of gene determinants on the translation speed and density of ribosomes. *Genome Biol*, 12(11), R110.

Williams, C. C., Jan, C. H., & Weissman, J. S. (2014). Targeting and plasticity of mitochondrial proteins revealed by proximity-specific ribosome profiling. *Science*, 346(6210), 748–751.

Wilson, D., Pethica, R., Zhou, Y., Talbot, C., Vogel, C., Madera, M., Chothia, C., & Gough, J. (2009). SUPERFAMILY—sophisticated comparative genomics, data mining, visualization and phylogeny. *Nucl Acids Res*, 37(Database issue), D380–6.

Zinshteyn, B. & Gilbert, W. V. (2013). Loss of a conserved tRNA anticodon modification perturbs cellular signaling. *PLoS Genet*, 9(8), e1003675.

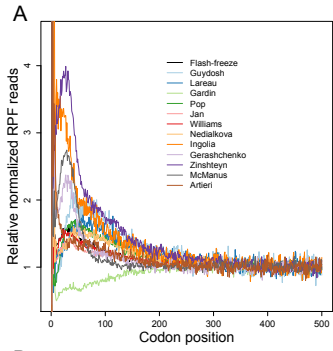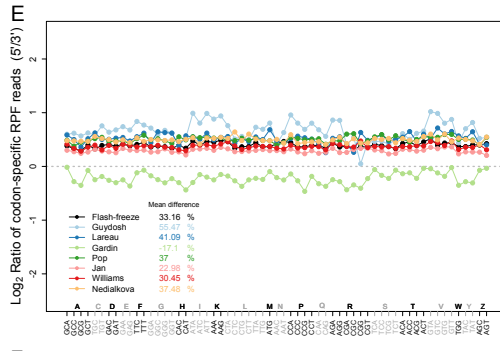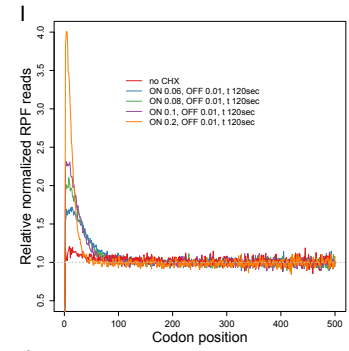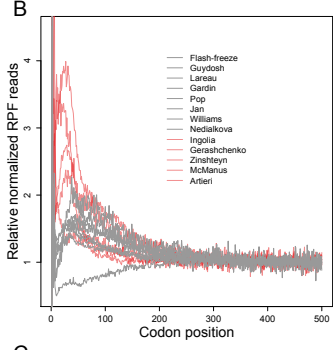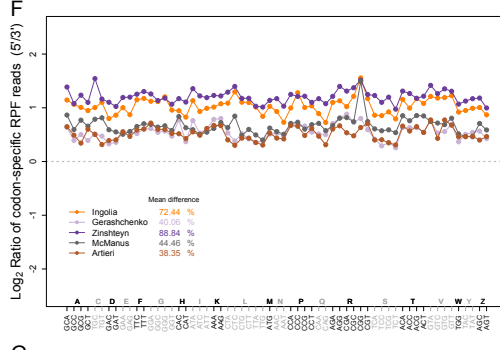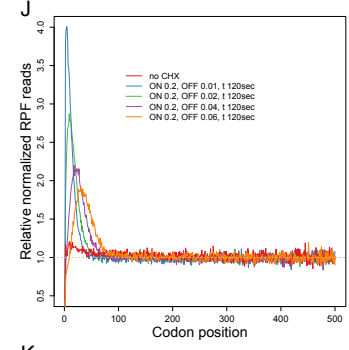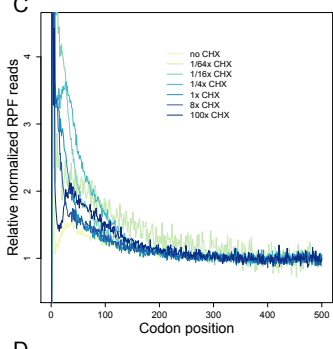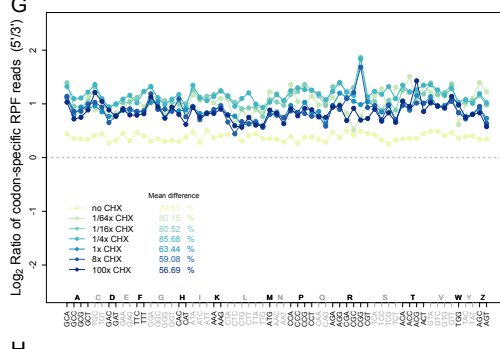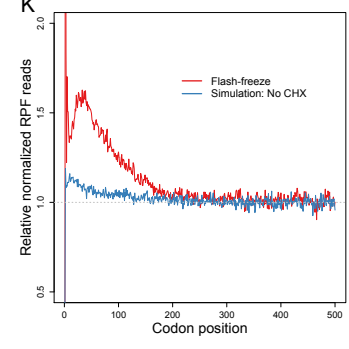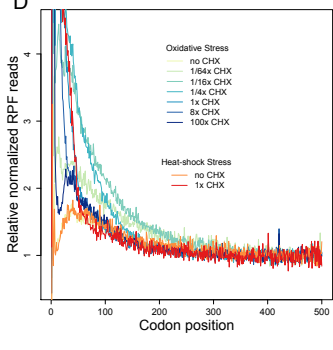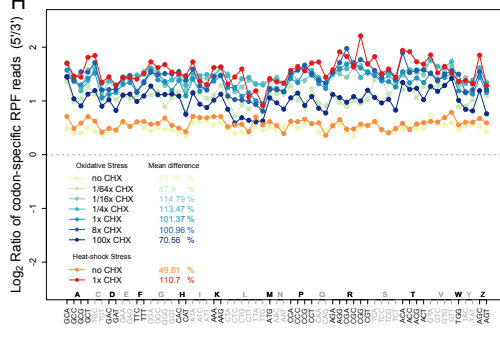



---

Figure S1 (*preceding page*): Analyses of the 5' ramp of ribosomes, Related to Figure 1. **(A-D)** Metagene analyses of RPF density, performed as in Figure 1D, comparing results of the current study (flash-freeze) to those of published studies. Published datasets in **(A)** are labeled by the first author's name: Guydosh (Guydosh & Green, 2014), Lareau (Lareau et al., 2014), Gardin (Gardin et al., 2014), Pop (Pop et al., 2014), Jan (Jan et al., 2014), Williams (Williams et al., 2014), Nedialkova (Nedialkova & Leidel, 2015), Ingolia (Ingolia et al., 2009), Gerashchenko (Gerashchenko et al., 2012), Zinshteyn (Zinshteyn & Gilbert, 2013), McManus (McManus et al., 2014), Artieri (Artieri & Fraser, 2014). **(B)** Same panel as in **(A)** with datasets using CHX-pretreatment colored in red and datasets without CHX-pretreatment colored in gray. **(C-D)** Datasets from Gerashchenko (Gerashchenko & Gladyshev, 2014) with varying levels of CHX-pretreatment under both unstressed **(C)** and stressed **(D)** conditions. **(E-H)** Comparison of codon-specific RPFs within and beyond the 5' ramp in datasets in **(A-D)**. **(I-K)** Metagene analyses of RPF density based on the whole-cell simulation model (Shah *et al.* 2013), performed as in Figure 1D. Simulations with CHX pre-treatment were performed as described in Section 2 of the Supporting File. We simulated protein synthesis under no-CHX, and either **(I)** four different CHX arrest probabilities ( $p_{chx-on}$ ) and a fixed CHX dissociation rate ( $r_{chx-off}$ ), or **(J)** a fixed CHX arrest probability ( $p_{chx-on}$ ) and four different CHX dissociation rates ( $r_{chx-off}$ ). Increasing  $p_{chx-on}$  led to higher ramps, whereas increasing  $r_{chx-off}$  led to lower ramps as well as a shift of the peak ribosome density towards the 3' end. **(K)** Metagene analysis of RPF density observed in the flash-freeze experiment compared with the results of the whole-cell simulation model. Otherwise, as in **(I)**.

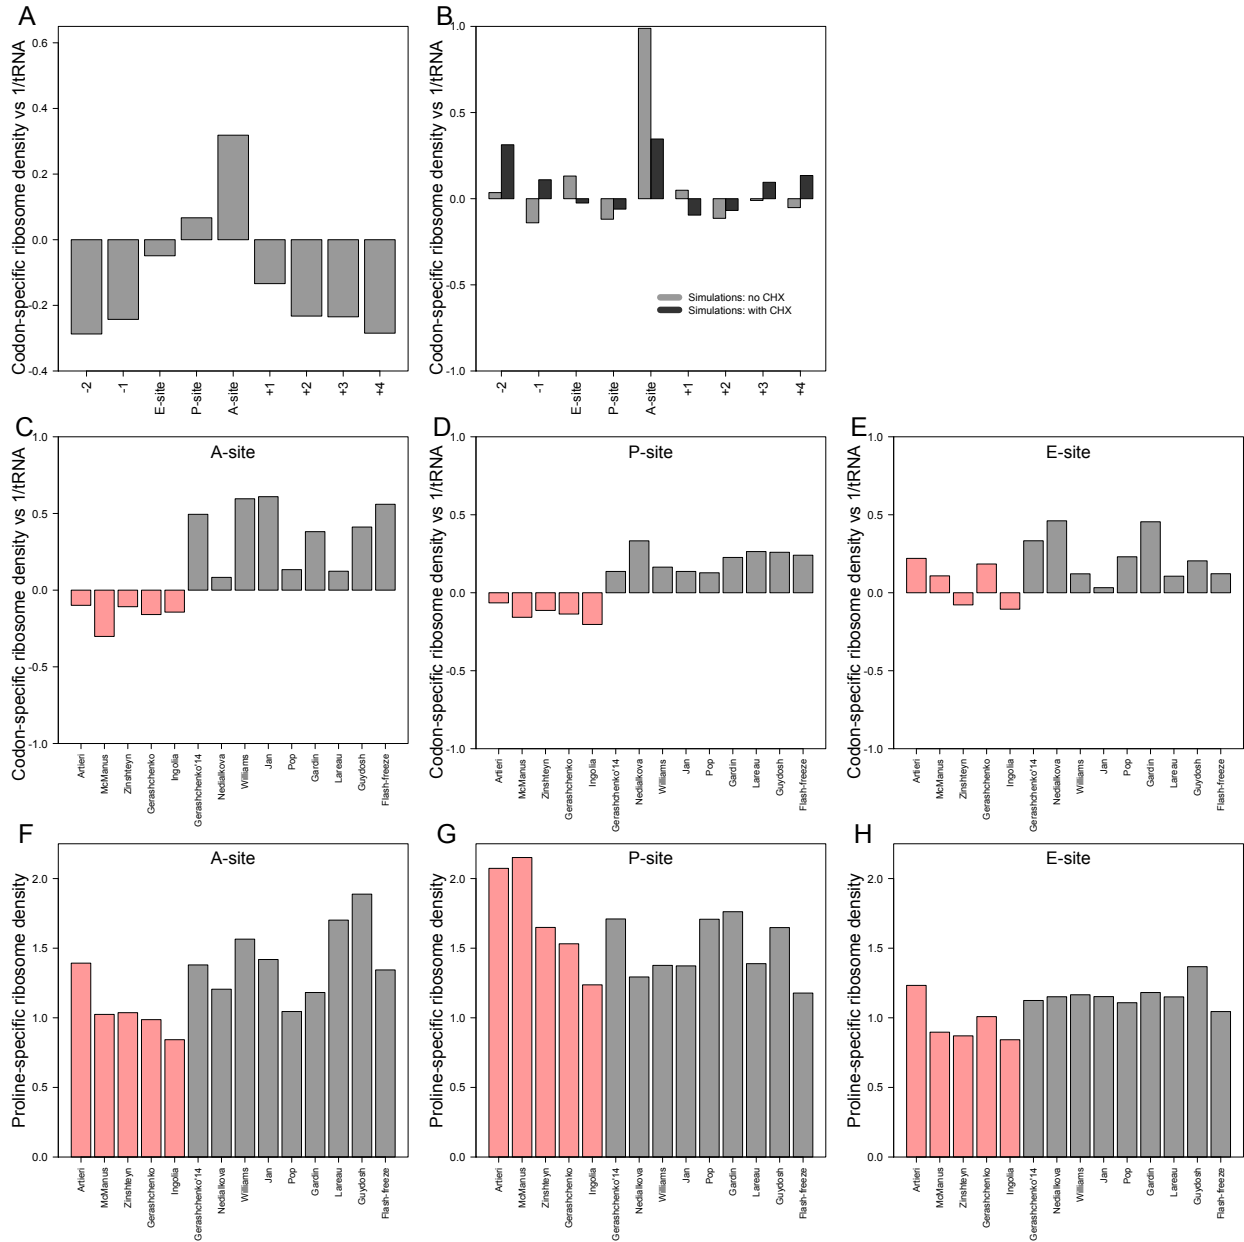

Figure S2: Relationship between cognate tRNA abundances and codon-specific ribosome densities, Related to Figure 2. **(A)** Correlation between codon-specific excess ribosome densities from the flash-freeze dataset and cognate tRNA abundances estimated using RNA-seq (Table S1). Otherwise, as in Figure 2B. **(B)** Correlation between codon-specific excess ribosome densities and cognate tRNA abundances in simulations with (black) and without (gray) CHX pretreatment. Otherwise, as in Figure 2B. **(C-E)** Correlation between codon-specific excess ribosome densities at the A-, P- and E-sites and cognate tRNA abundances, respectively. **(F-H)** Proline-specific ribosome densities in 13 ribosome-profiling experiments. RPF reads were assigned to the A-, P-, and E-site positions based on the distance from the 5' ends of fragments, to calculate proline-specific excess ribosome densities. Published datasets are labeled by the first author's name: Guydosh (Guydosh & Green, 2014), Lareau (Lareau et al., 2014), Gardin (Gardin et al., 2014), Pop (Pop et al., 2014), Jan (Jan et al., 2014), Williams (Williams et al., 2014), Nedialkova (Nedialkova & Leidel, 2015), Gerashchenko 2014 (Gerashchenko & Gladyshev, 2014), Ingolia (Ingolia et al., 2009), Gerashchenko (Gerashchenko et al., 2012), Zinshteyn (Zinshteyn & Gilbert, 2013), McManus (McManus et al., 2014), Artieri (Artieri & Fraser, 2014). Datasets using CHX-pretreatment colored in red and datasets without CHX-pretreatment colored in gray. Otherwise, as in Figure 2B.

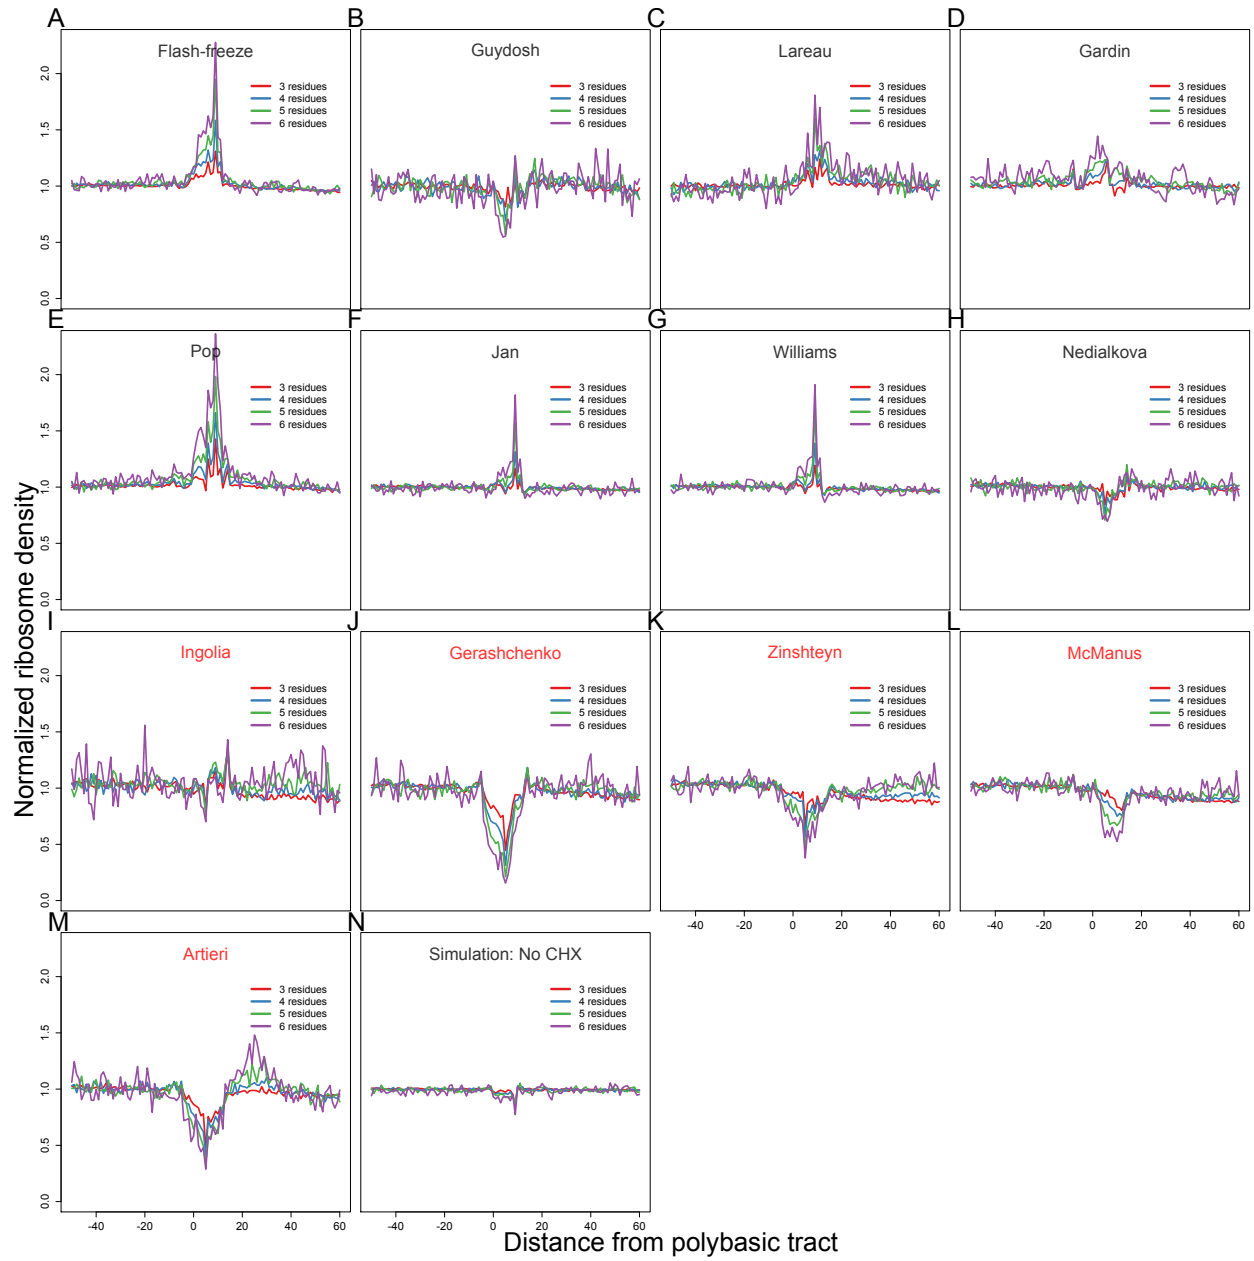

---

Figure S3 (*preceding page*): Analyses of ribosome stalling near polybasic tracts, Related to Figure 2. (**A-N**) Metagene analysis of normalized ribosome density surrounding polybasic tracts in our flash-freeze, twelve other published ribosome-profiling experiments and whole-cell simulations. Regions within ORFs that contained the indicated number of basic residues (arginine and lysine) within a stretch of 10 amino acids were aligned by the start of the region. Plotted are the normalized ribosome densities ( $z_{i,j}$ , Eqn. S7) observed at each codon position. Published datasets are labeled by the first author's name: Guydosh (Guydosh & Green, 2014), Lareau (Lareau et al., 2014), Gardin (Gardin et al., 2014), Pop (Pop et al., 2014), Jan (Jan et al., 2014), Williams (Williams et al., 2014), Nedialkova (Nedialkova & Leidel, 2015), Ingolia (Ingolia et al., 2009), Gerashchenko (Gerashchenko et al., 2012), Zinshteyn (Zinshteyn & Gilbert, 2013), McManus (McManus et al., 2014), Artieri (Artieri & Fraser, 2014). Datasets using CHX-pretreatment names in red and datasets without CHX-pretreatment named in black.

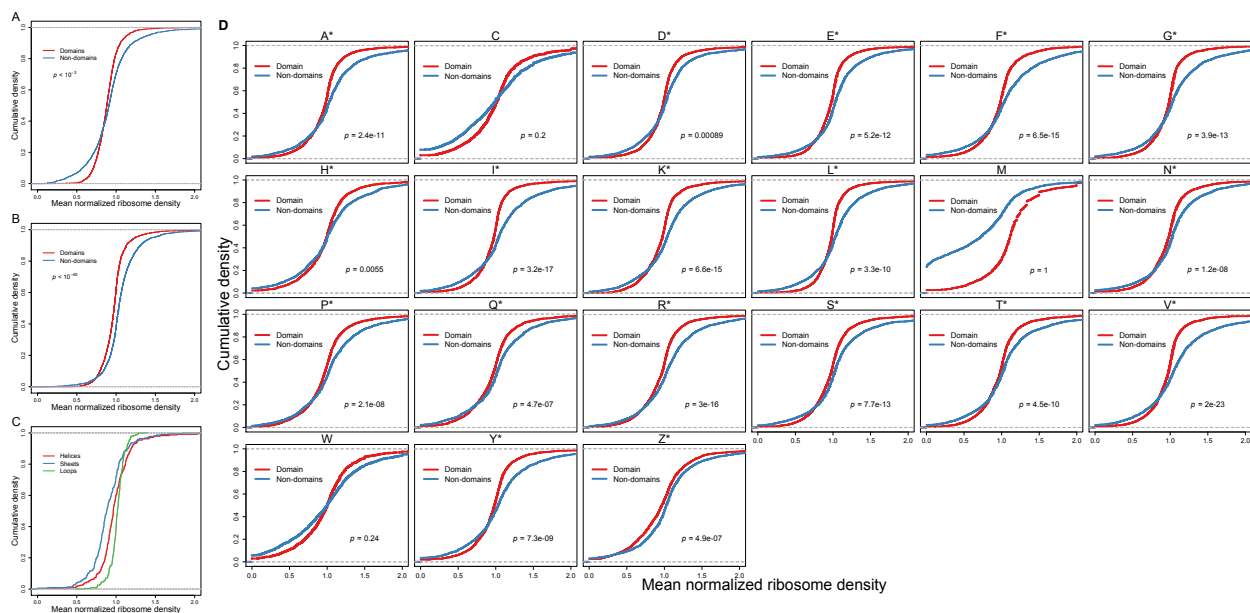

Figure S4: Relationship between elongation dynamics and either domain architecture or protein secondary structure. Related to Figure 3. **(A)** Cumulative distributions of normalized ribosome densities within and outside of protein-folding domains, considering ORFs with at least 250 codons but ignoring the first 200 codons in each ORF. Otherwise, as in Figure 3A. **(B)** Cumulative distributions of normalized ribosome densities within and outside of protein-folding domains. Domain assignments were based on InterProScan classifications (Jones *et al.* 2014) using the Pfam database (Bateman *et al.* 2002). Otherwise, as in Figure 3A. **(C)** Cumulative distributions of normalized ribosome densities within the indicated classes of protein secondary structures (helices, sheets and loops). Secondary structure assignments for proteins were obtained from (Pechmann and Frydman 2013). Otherwise, as in Figure 3A. **(D)** Relationship between elongation dynamics and domain architecture for individual amino acids. Cumulative distributions of normalized ribosome densities within and outside of protein-folding domains, analyzed for each amino acid. Mean normalized ribosome densities ( $z_{i,j}$ , Eqn. S7) for codons within the domain-encoding and non-domain-encoding regions were individually calculated for each ORF. Panels are labeled with the single-letter code for each amino acid. Serine codons are partitioned into two sets with 4 and 2 codons (S and Z, respectively). Statistically significant ( $p < 0.05$ ) slowing outside of protein-folding domains is indicated (asterisk). Otherwise, as in Figure 3A.

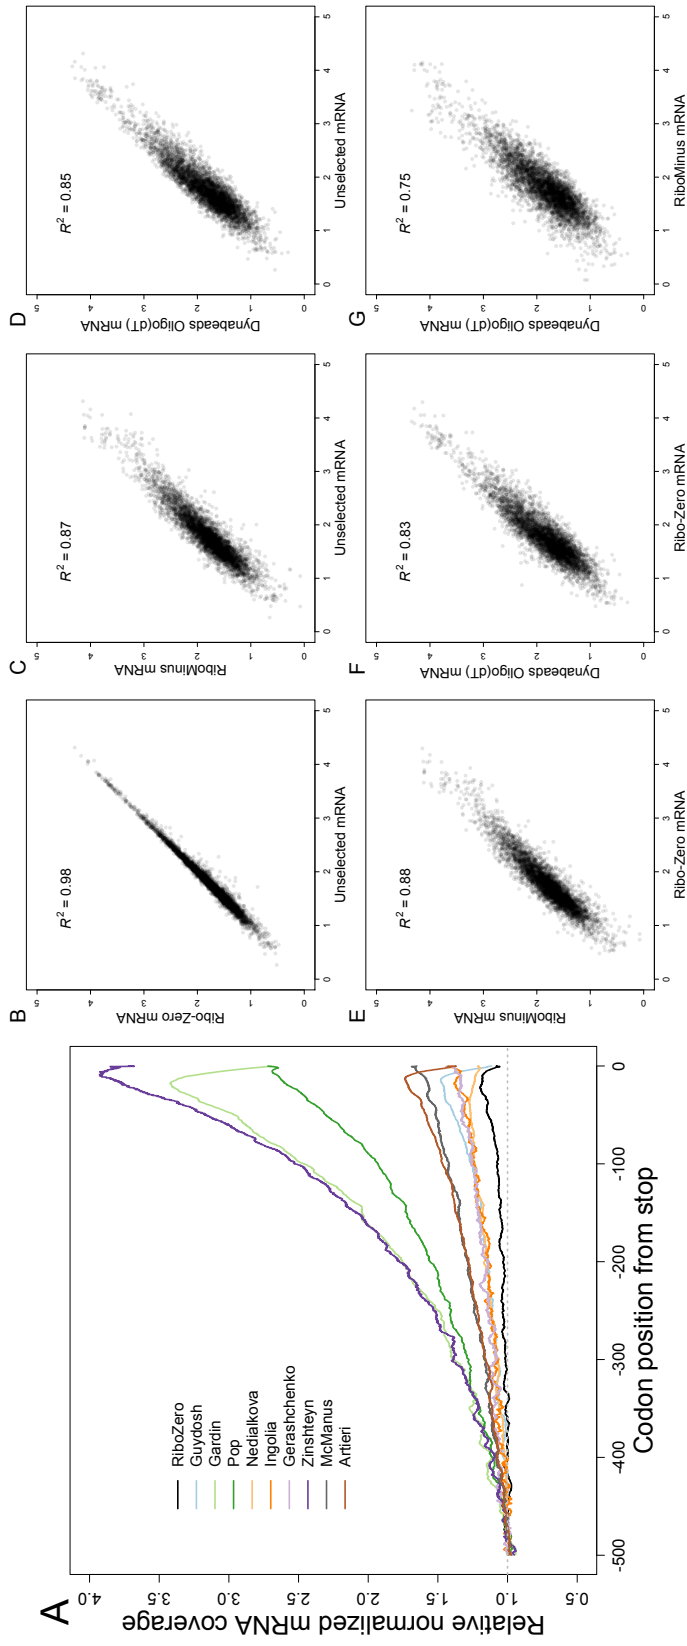

Figure S5: 3' bias observed in RNA-seq datasets and effect of mRNA enrichment methods on mRNA abundance measurements, Related to Figure 4. (A) Metagene analysis of RNA-seq read coverage in ten ribosome-profiling experiments. Otherwise, as in Figure 4B. (B-G) Pairwise comparisons of mRNA abundances ( $\text{Log}_{10}$  RPKM) following mRNA enrichment by the indicated methods. Otherwise, as in Figure 4A. For comparison, Figure 4A is repeated as panel A.

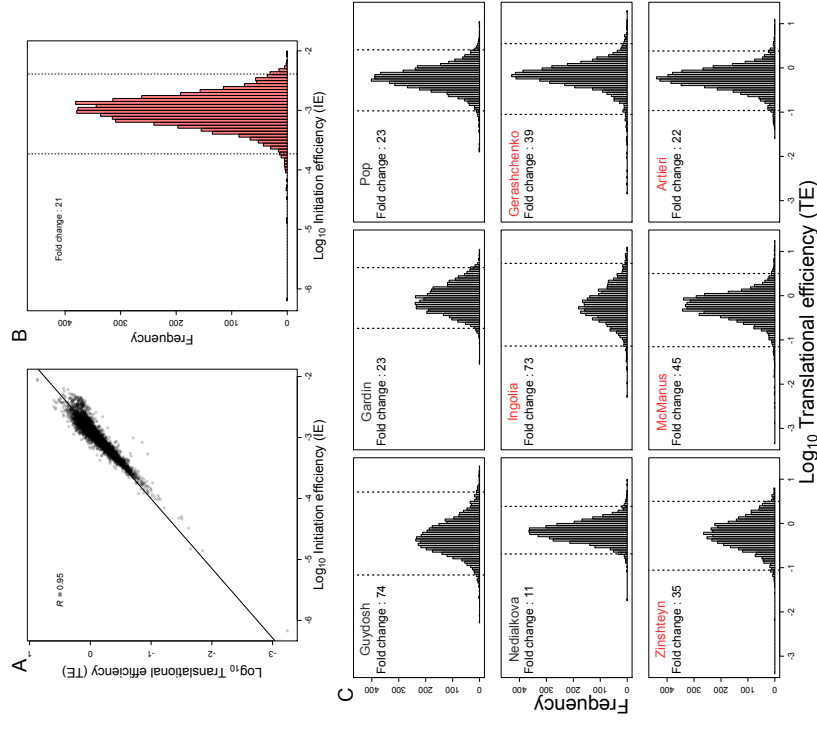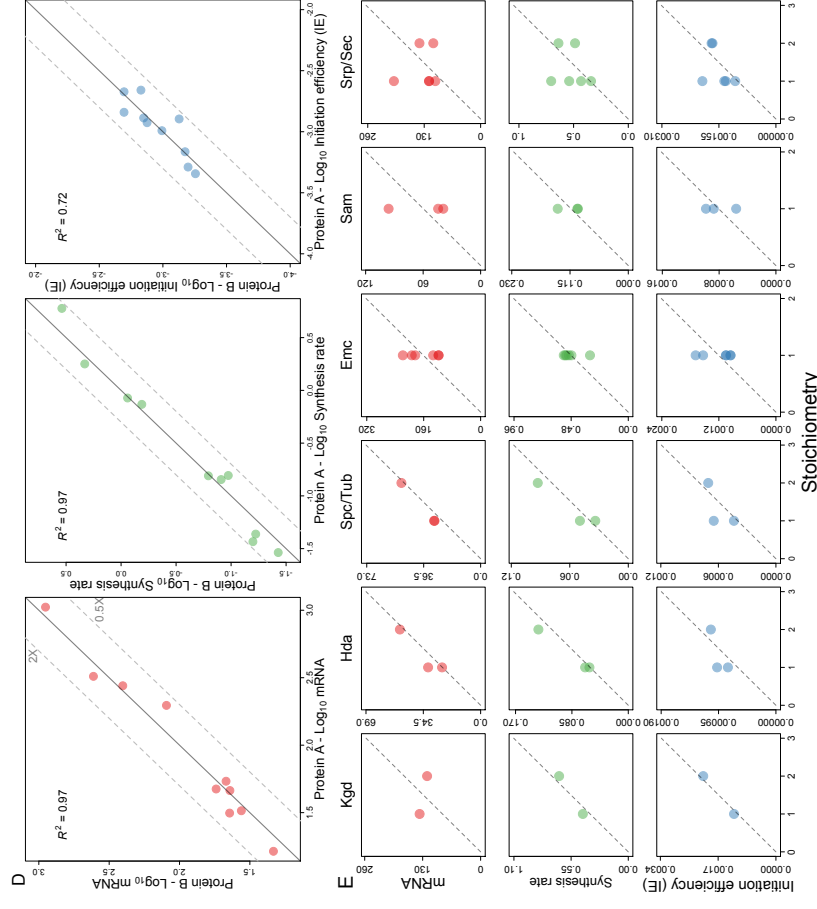

---

Figure S6 (*preceding page*): Analyses of IEs and TEs in log-phase yeast cells, Related to Figure 5. **(A)** Relationship between TE values ( $TE$ , Eqn. S6) and IE values ( $p^E$ , Eqn. S27). **(B)** Distribution of IE values. Otherwise, as in Figure 5A. **(C)** Distributions of TE measurements from nine published ribosome-profiling experiments. Ribosome-profiling datasets are labeled by the first author's name: Guydosh (Guydosh & Green, 2014), Gardin (Gardin et al., 2014), Pop (Pop et al., 2014), Nedialkova (Nedialkova & Leidel, 2015), Ingolia (Ingolia et al., 2009), Gerashchenko (Gerashchenko et al., 2012), Zinshteyn (Zinshteyn & Gilbert, 2013), McManus (McManus et al., 2014), Artieri (Artieri & Fraser, 2014). Datasets using CHX-pretreatment names in red and datasets without CHX-pretreatment named in gray. Otherwise, as in Figure 5A. **(D)** mRNA abundance and translational control contribute to proportional synthesis, Analysis of complexes with two equimolar subunits. For each heterodimeric complex, the mRNA abundances (left), estimated synthesis rates (middle), and IEs (right) of the individual subunits are plotted (with the subunit whose systematic name is first alphabetically on the x axis). All of the heterodimeric complexes characterized in Li et al. (2014) are shown, with the exception of the Smc2/4 complex, which substantially deviates from proportional synthesis in both our dataset and the published dataset. Dashed lines indicate 2-fold differences. **(E)** Analysis of multi-protein complexes. For each complex, the mRNA abundances, synthesis rates, and IEs of its subunits are plotted as a function of subunit stoichiometry. Dashed line passes through the origin and mean of the data-points. **(F)** Analyses of complexes containing paralogous subunits. For each complex, data for alternative subunits are plotted in the same column relative to the data for the constitutive subunit (Tub2 for the  $\alpha\beta$ -tubulin complex, Sec23 for the COPII vesicle coat). **(G)** Comparison of the differences in mRNA abundances with those of synthesis rates for each of the complexes in **(D)** and **(E)**. Data were normalized to subunit stoichiometry, and coefficients of variation (CVs) were calculated using all subunits within each complex. CVs were calculated similarly for the Sec23- and Tub2-containing complexes, except that data for paralogous subunits (Tub1 and Tub3; Sec24, Sfb2, and Sfb3) were first summed.



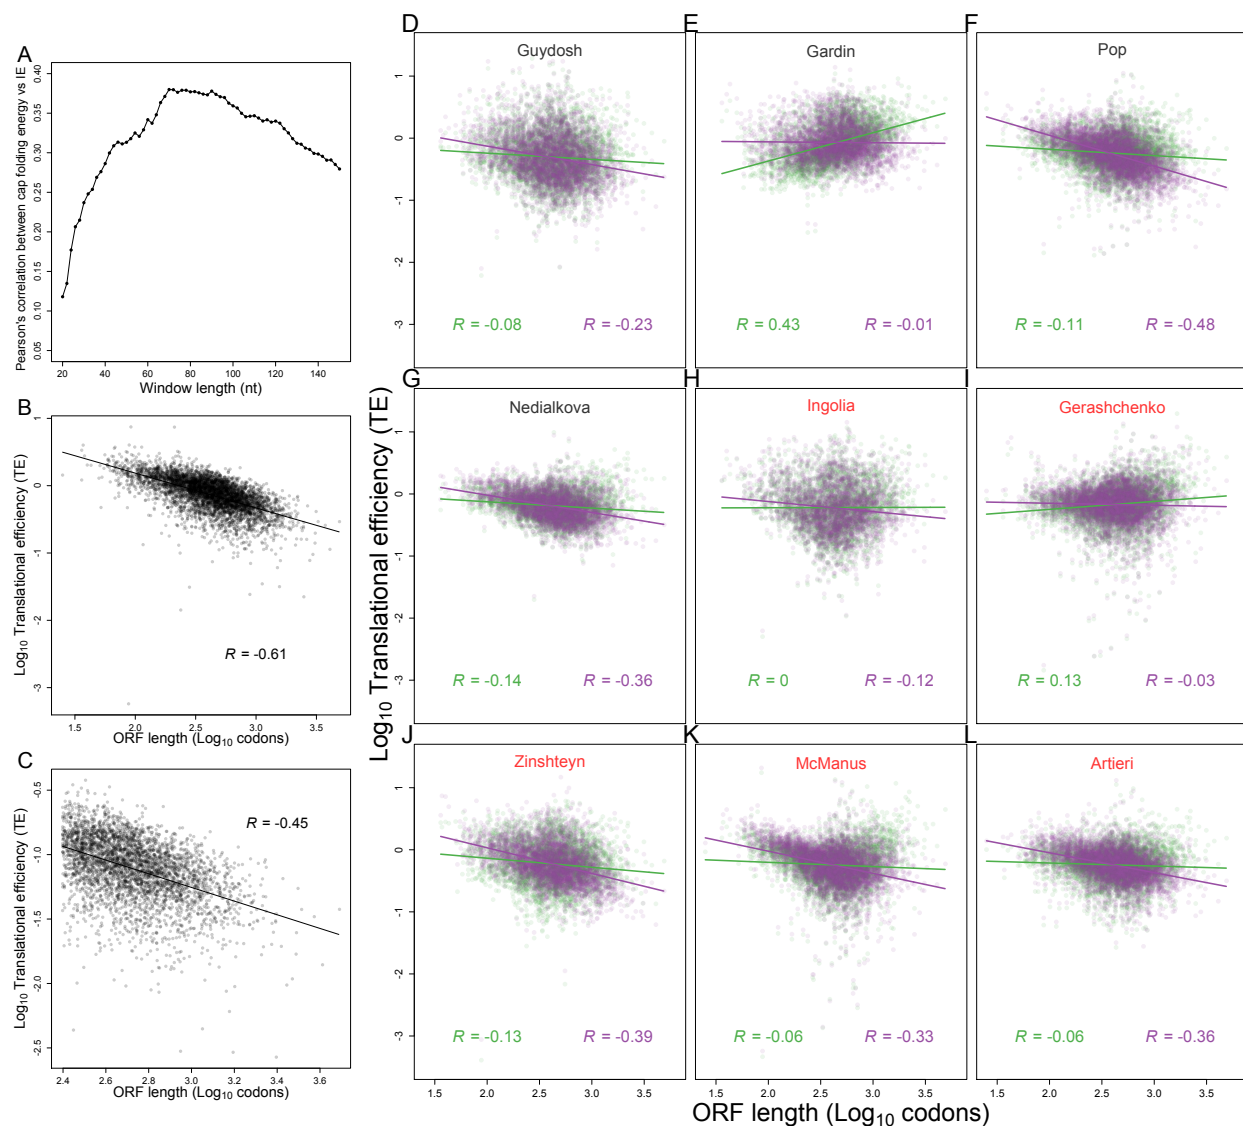

Figure S7: Analyses of the relationship between gene length and TE, Related to Figure 6. **(A)** Influence of window length on the correlation between predicted RNA structure and IE. Correlations between predicted RNA secondary structures near the 5' cap (5' cap FE) and IE ( $p^E$ , Eqn. S27), as a function of the length of the folded sequence. RNAfold was used to estimate RNA folding energies for windows of the indicated lengths downstream of the 5'-cap. **(B)** Relationship between TE and ORF length observed when analyzing the flash-freeze dataset. The best linear least-squares fit to the data is shown (line), with the Pearson  $R$ . **(C)** Relationship between TE and ORF length observed after excluding data from within the 5' ramp. Only genes with 250 codons were considered, and RPF and RNA-seq reads mapping to the first 200 codons of each ORF were excluded. Otherwise, as in **(B)**. **(D-L)** Relationship between TE and ORF length and the role of 3' bias observed in RNA-seq reads in published ribosome-profiling datasets. For each ORF, mRNA RPKM calculated based on reads mapping to the entire ORF is shown as green dots. mRNA RPKM when calculated based only on reads mapping to the last 200 codons of an ORF are shown as purple dots. Ribosome-profiling datasets are labeled by the first author's name: Guydosh (Guydosh & Green, 2014), Gardin (Gardin et al., 2014), Pop (Pop et al., 2014), Nedialkova (Nedialkova & Leidel, 2015), Ingolia (Ingolia et al., 2009), Gerashchenko (Gerashchenko et al., 2012), Zinshteyn (Zinshteyn & Gilbert, 2013), McManus (McManus et al., 2014), Artieri (Artieri & Fraser, 2014). Datasets using CHX-pretreatment names in red and datasets without CHX-pretreatment named in gray.

Table S1 - Correlations between estimates of tRNA abundances and codon-specific ribosome-densities, Related to Figure 2

| <b>Pearson's correlation</b>                | <i>(tRNA GCN * Wobble)</i> | <i>tRNA abundance (Microarray * Wobble)</i> | <i>tAI</i> | <i>RiboDensity at A-site</i> |
|---------------------------------------------|----------------------------|---------------------------------------------|------------|------------------------------|
| <i>tRNA abundance (RNA-seq * Wobble)</i>    | 0.748                      | 0.608                                       | 0.713      | 0.268                        |
| <i>(tRNA GCN * Wobble)</i>                  |                            | 0.778                                       | 0.947      | 0.512                        |
| <i>tRNA abundance (Microarray * Wobble)</i> |                            |                                             | 0.713      | 0.459                        |
| <i>tAI</i>                                  |                            |                                             |            | 0.509                        |

| <b>Spearman's correlation</b>               | <i>(tRNA GCN * Wobble)</i> | <i>tRNA abundance (Microarray * Wobble)</i> | <i>tAI</i> | <i>RiboDensity at A-site</i> |
|---------------------------------------------|----------------------------|---------------------------------------------|------------|------------------------------|
| <i>tRNA abundance (RNA-seq * Wobble)</i>    | 0.777                      | 0.605                                       | 0.752      | 0.319                        |
| <i>(tRNA GCN * Wobble)</i>                  |                            | 0.785                                       | 0.917      | 0.560                        |
| <i>tRNA abundance (Microarray * Wobble)</i> |                            |                                             | 0.711      | 0.463                        |
| <i>tAI</i>                                  |                            |                                             |            | 0.532                        |

Table S2 - Codon-specific estimates of ribosome-densities and tRNA abundances, Related to Figure 2.

| AA | Codon | tRNA (anticodon) | tRNA gene copy number | Wobble | (tRNA GCN * Wobble) | tAI      | tRNA abundance (RNA-seq) | tRNA abundance (RNA-seq * Wobble) | tRNA abundance (Microarray) | tRNA abundance (Microarray * Wobble) | RiboDensity at A-site |
|----|-------|------------------|-----------------------|--------|---------------------|----------|--------------------------|-----------------------------------|-----------------------------|--------------------------------------|-----------------------|
| A  | GCA   | TGC              | 5                     | 1      | 5                   | 0.30795  | 384682                   | 384682                            | 26087                       | 26087                                | 1.4224238             |
| A  | GCC   | AGC              | 11                    | 0.64   | 7.04                | 0.487685 |                          | 136141.44                         |                             | 41927.04                             | 0.6982879             |
| A  | GCG   | TGC              | 5                     | 0.64   | 3.2                 | 0.098522 |                          | 246196.48                         |                             | 16695.68                             | 1.7913012             |
| A  | GCT   | AGC              | 11                    | 1      | 11                  | 0.67734  | 212721                   | 212721                            | 65511                       | 65511                                | 0.7439787             |
| C  | TGC   | GCA              | 4                     | 1      | 4                   | 0.246305 | 106137                   | 106137                            | 84453                       | 84453                                | 1.3124677             |
| C  | TGT   | GCA              | 4                     | 0.64   | 2.56                | 0.108128 |                          | 67927.68                          |                             | 54049.92                             | 0.8129126             |
| D  | GAC   | GTC              | 16                    | 1      | 16                  | 0.985222 | 1789916                  | 1789916                           | 105539                      | 105539                               | 0.9749501             |
| D  | GAT   | GTC              | 16                    | 0.64   | 10.24               | 0.432512 |                          | 1145546.24                        |                             | 67544.96                             | 0.9771609             |
| E  | GAA   | TTC              | 14                    | 1      | 14                  | 0.862069 | 1618235                  | 1618235                           | 121285                      | 121285                               | 0.9358888             |
| E  | GAG   | CTC              | 2                     | 1      | 2                   | 0.399015 | 393379                   | 393379                            | NA                          | 8663.214286                          | 1.3490997             |
| F  | TTC   | GAA              | 10                    | 1      | 10                  | 0.615764 | 104391                   | 104391                            | 81287                       | 81287                                | 0.6956495             |
| F  | TTT   | GAA              | 10                    | 0.64   | 6.4                 | 0.27032  |                          | 66810.24                          |                             | 52023.68                             | 0.6862277             |
| G  | GGA   | TCC              | 3                     | 1      | 3                   | 0.184729 | 287325                   | 287325                            | 61092                       | 61092                                | 1.5260655             |
| G  | GGC   | GCC              | 16                    | 1      | 16                  | 0.985222 | 826342                   | 826342                            | 70286                       | 70286                                | 1.4416823             |
| G  | GGG   | CCC              | 2                     | 1      | 2                   | 0.182266 | 129338                   | 129338                            | 21404                       | 21404                                | 1.7256386             |
| G  | GGT   | GCC              | 16                    | 0.64   | 10.24               | 0.432512 |                          | 528858.88                         |                             | 44983.04                             | 1.0667916             |
| H  | CAC   | GTG              | 7                     | 1      | 7                   | 0.431034 | 727396                   | 727396                            | 81702                       | 81702                                | 0.9154641             |
| H  | CAT   | GTG              | 7                     | 0.64   | 4.48                | 0.189224 |                          | 465533.44                         |                             | 52289.28                             | 0.9922004             |
| I  | ATA   | TAT              | 2                     | 1      | 2                   | 0.123233 | 54352                    | 54352                             | 39556                       | 39556                                | 1.394014              |
| I  | ATC   | AAT              | 13                    | 0.64   | 8.32                | 0.576355 |                          | 586391.04                         |                             | 67769.6                              | 0.7039792             |
| I  | ATT   | AAT              | 13                    | 1      | 13                  | 0.800493 | 916236                   | 916236                            | 105890                      | 105890                               | 0.6284445             |
| K  | AAA   | TTT              | 7                     | 1      | 7                   | 0.431034 | 222273                   | 222273                            | 82386                       | 82386                                | 0.978243              |
| K  | AAG   | CTT              | 14                    | 1      | 14                  | 1        | 397111                   | 397111                            | 83036                       | 83036                                | 1.0943089             |
| L  | CTA   | TAG              | 3                     | 1      | 3                   | 0.184729 | 94608                    | 94608                             | 63675                       | 63675                                | 0.9165169             |
| L  | CTC   | GAG              | 1                     | 1      | 1                   | 0.061576 | 63503                    | 63503                             | 13613                       | 13613                                | 1.1024675             |
| L  | CTG   | TAG              | 3                     | 0.64   | 1.92                | 0.059113 |                          | 60549.12                          |                             | 40752                                | 1.4565058             |
| L  | CTT   | GAG              | 1                     | 0.64   | 0.64                | 0.027032 |                          | 40641.92                          |                             | 8712.32                              | 0.9176823             |
| L  | TTA   | TAA              | 7                     | 1      | 7                   | 0.431034 | 271592                   | 271592                            | 49562                       | 49562                                | 0.7272969             |
| L  | TTG   | CAA              | 10                    | 1      | 10                  | 0.753695 | 709768                   | 709768                            | 96605                       | 96605                                | 0.7904184             |
| M  | ATG   | CAT              | 10                    | 1      | 10                  | 0.615764 | 266917                   | 266917                            | 67121                       | 67121                                | 0.8415256             |
| N  | AAC   | GTT              | 10                    | 1      | 10                  | 0.615764 | 378101                   | 378101                            | 110849                      | 110849                               | 0.6898425             |
| N  | AAT   | GTT              | 10                    | 0.64   | 6.4                 | 0.27032  |                          | 241984.64                         |                             | 70943.36                             | 0.7078108             |
| P  | CCA   | TGG              | 10                    | 1      | 10                  | 0.615776 | 286531                   | 286531                            | 112091                      | 112091                               | 1.0842912             |
| P  | CCC   | AGG              | 2                     | 0.64   | 1.28                | 0.08867  |                          | 36940.8                           |                             | 11043.84                             | 1.3106768             |
| P  | CCG   | TGG              | 10                    | 0.64   | 6.4                 | 0.197044 |                          | 183379.84                         |                             | 71738.24                             | 3.1205299             |
| P  | CCT   | AGG              | 2                     | 1      | 2                   | 0.123153 | 57720                    | 57720                             | 17256                       | 17256                                | 1.0239082             |
| Q  | CAA   | TTG              | 9                     | 1      | 9                   | 0.554187 | 436225                   | 436225                            | 89917                       | 89917                                | 0.8659004             |
| Q  | CAG   | CTG              | 1                     | 1      | 1                   | 0.238916 | 89093                    | 89093                             | NA                          | 9990.777778                          | 1.6325536             |
| R  | AGA   | TCT              | 11                    | 1      | 11                  | 0.67734  | 683001                   | 683001                            | 98864                       | 98864                                | 1.1308364             |
| R  | AGG   | CCT              | 1                     | 1      | 1                   | 0.278325 | 106890                   | 106890                            | 12911                       | 12911                                | 1.939357              |
| R  | CGA   | ACG              | 6                     | 0.61   | 3.66                | 0.000037 |                          | 261137.95                         |                             | 36380.4                              | 3.6442612             |
| R  | CGC   | ACG              | 6                     | 0.64   | 3.84                | 0.26601  |                          | 273980.8                          |                             | 38169.6                              | 1.6633606             |
| R  | CGG   | CCG              | 1                     | 1      | 1                   | 0.061576 | 60792                    | 60792                             | 15330                       | 15330                                | 4.0202765             |
| R  | CGT   | ACG              | 6                     | 1      | 6                   | 0.369458 | 428095                   | 428095                            | 59640                       | 59640                                | 1.0459032             |
| S  | TCA   | TGA              | 3                     | 1      | 3                   | 0.184797 | 86913                    | 86913                             | 58804                       | 58804                                | 1.0015308             |
| S  | TCC   | AGA              | 11                    | 0.64   | 7.04                | 0.487685 |                          | 507436.8                          |                             | 58654.72                             | 0.7072965             |
| S  | TCG   | CGA              | 1                     | 1      | 1                   | 0.12069  | 34793                    | 34793                             | 49376                       | 49376                                | 1.3549748             |
| S  | TCT   | AGA              | 11                    | 1      | 11                  | 0.67734  | 792870                   | 792870                            | 91648                       | 91648                                | 0.6624122             |
| T  | ACA   | TGT              | 4                     | 1      | 4                   | 0.246373 | 105862                   | 105862                            | 47598                       | 47598                                | 1.3252482             |
| T  | ACC   | AGT              | 11                    | 0.64   | 7.04                | 0.487685 |                          | 244374.4                          |                             | 36396.16                             | 0.6976534             |
| T  | ACG   | CGT              | 1                     | 1      | 1                   | 0.140394 | 113104                   | 113104                            | 16861                       | 16861                                | 1.7572598             |
| T  | ACT   | AGT              | 11                    | 1      | 11                  | 0.67734  | 381835                   | 381835                            | 56869                       | 56869                                | 0.692477              |
| V  | GTA   | TAC              | 2                     | 1      | 2                   | 0.123239 | 145923                   | 145923                            | 33845                       | 33845                                | 0.9784524             |
| V  | GTC   | AAC              | 14                    | 0.64   | 8.96                | 0.62069  |                          | 515950.72                         |                             | 56675.84                             | 0.6841453             |
| V  | GTG   | CAC              | 2                     | 1      | 2                   | 0.162562 | 118162                   | 118162                            | 44651                       | 44651                                | 1.2778867             |
| V  | GTT   | AAC              | 14                    | 1      | 14                  | 0.862069 | 806173                   | 806173                            | 88556                       | 88556                                | 0.6336201             |
| W  | TGG   | CCA              | 6                     | 1      | 6                   | 0.369458 | 298500                   | 298500                            | 60236                       | 60236                                | 1.7898831             |
| Y  | TAC   | GTA              | 8                     | 1      | 8                   | 0.492611 | 343867                   | 343867                            | 91388                       | 91388                                | 0.9352348             |
| Y  | TAT   | GTA              | 8                     | 0.64   | 5.12                | 0.216256 |                          | 220074.88                         |                             | 58488.32                             | 0.8397308             |
| Z  | AGC   | GCT              | 2                     | 1      | 2                   | 0.123153 | 249948                   | 249948                            | 61334                       | 61334                                | 1.1973314             |
| Z  | AGT   | GCT              | 2                     | 0.64   | 1.28                | 0.054064 |                          | 159966.72                         |                             | 39253.76                             | 0.9498069             |

Table S3 – Analysis of 3' bias in RNA-seq datasets, Related to Figure 4.

| <b>Pearson correlation between mRNA abundances (Log<sub>10</sub> RPKM)</b>                    | <b>Arava</b>             | <b>Holstege</b>             | <b>Causton</b>             | <b>Sun</b>             |
|-----------------------------------------------------------------------------------------------|--------------------------|-----------------------------|----------------------------|------------------------|
| Ingolia                                                                                       | 0.645                    | 0.743                       | 0.626                      | 0.74                   |
| Gerashchenko                                                                                  | 0.7                      | 0.828                       | 0.747                      | 0.862                  |
| Zinshteyn                                                                                     | 0.652                    | 0.773                       | 0.645                      | 0.75                   |
| McManus                                                                                       | 0.667                    | 0.79                        | 0.733                      | 0.797                  |
| Artieri                                                                                       | 0.715                    | 0.852                       | 0.788                      | 0.848                  |
| Guydosh                                                                                       | 0.66                     | 0.777                       | 0.666                      | 0.791                  |
| Gardin                                                                                        | 0.673                    | 0.828                       | 0.728                      | 0.846                  |
| Pop                                                                                           | 0.727                    | 0.845                       | 0.774                      | 0.894                  |
| Nedialkova                                                                                    | 0.722                    | 0.878                       | 0.8                        | 0.884                  |
| Unselected                                                                                    | 0.753                    | 0.875                       | 0.819                      | 0.883                  |
| Ribo-Zero                                                                                     | 0.761                    | 0.869                       | 0.812                      | 0.882                  |
| Ribo-Minus                                                                                    | 0.722                    | 0.839                       | 0.76                       | 0.84                   |
| Dynabeads                                                                                     | 0.719                    | 0.869                       | 0.795                      | 0.897                  |
|                                                                                               |                          |                             |                            |                        |
| <b>Pearson correlation between ratio of mRNA abundances and ORF length (Log<sub>10</sub>)</b> | <b>Relative to Arava</b> | <b>Relative to Holstege</b> | <b>Relative to Causton</b> | <b>Relative to Sun</b> |
| Ingolia                                                                                       | -0.653                   | -0.341                      | -0.331                     | -0.344                 |
| Gerashchenko                                                                                  | -0.607                   | -0.45                       | -0.406                     | -0.468                 |
| Zinshteyn                                                                                     | -0.619                   | -0.353                      | -0.325                     | -0.344                 |
| McManus                                                                                       | -0.551                   | -0.308                      | -0.306                     | -0.277                 |
| Artieri                                                                                       | -0.547                   | -0.403                      | -0.38                      | -0.367                 |
| Guydosh                                                                                       | -0.65                    | -0.436                      | -0.392                     | -0.43                  |
| Gardin                                                                                        | -0.638                   | -0.496                      | -0.44                      | -0.496                 |
| Pop                                                                                           | -0.496                   | -0.305                      | -0.298                     | -0.328                 |
| Nedialkova                                                                                    | -0.521                   | -0.272                      | -0.261                     | -0.237                 |
| Unselected                                                                                    | -0.112                   | 0.206                       | 0.072                      | 0.217                  |
| Ribo-Zero                                                                                     | -0.107                   | 0.209                       | 0.077                      | 0.226                  |
| Ribo-Minus                                                                                    | -0.061                   | 0.24                        | 0.105                      | 0.244                  |
| Dynabeads                                                                                     | -0.51                    | -0.411                      | -0.376                     | -0.444                 |

Table S4 - Excess mRNA coverage in 3' relative to 5' based on 50 codons (150 nt), Related to Figure 4.

|                     | Metagene 5' excess | Metagene 3' excess | Metagene excess 3'/5' | Gene-specific median ratio 3'/5' | Gene-specific median excess 3'/5' |
|---------------------|--------------------|--------------------|-----------------------|----------------------------------|-----------------------------------|
| <b>Unselected</b>   | 0.891              | 1.096              | 23.00%                | 1.223                            | 22.30%                            |
| <b>RiboZero</b>     | 0.879              | 1.125              | 28.00%                | 1.284                            | 28.40%                            |
| <b>RiboMinus</b>    | 0.893              | 1.367              | 53.10%                | 1.532                            | 53.20%                            |
| <b>Dynabeads</b>    | 0.549              | 2.104              | 283.20%               | 3.757                            | 275.70%                           |
| <b>Guydosh</b>      | 0.782              | 1.284              | 64.20%                | 1.563                            | 56.30%                            |
| <b>Gardin</b>       | 0.535              | 2.014              | 276.70%               | 3.586                            | 258.60%                           |
| <b>Pop</b>          | 0.562              | 1.789              | 218.20%               | 2.918                            | 191.80%                           |
| <b>Nedialkova</b>   | 0.753              | 1.17               | 55.50%                | 1.493                            | 49.30%                            |
| <b>Ingolia</b>      | 0.812              | 1.234              | 52.00%                | 1.416                            | 41.60%                            |
| <b>Gerashchenko</b> | 0.786              | 1.206              | 53.50%                | 1.46                             | 46.00%                            |
| <b>Zinshteyn</b>    | 0.587              | 2.137              | 263.70%               | 3.284                            | 228.40%                           |
| <b>McManus</b>      | 0.709              | 1.368              | 93.00%                | 1.699                            | 69.90%                            |
| <b>Artieri</b>      | 0.726              | 1.397              | 92.30%                | 1.791                            | 79.10%                            |



Table S6 – Model selection of determinants of initiation efficiencies, Related to Figure 7.

| Model - Initiation Efficiency                                                                                         | R <sup>2</sup> |
|-----------------------------------------------------------------------------------------------------------------------|----------------|
|                                                                                                                       |                |
| log(pE) ~ (5' cap folding energy)                                                                                     | 0.144          |
| log(pE) ~ log(Length)                                                                                                 | 0.2295         |
| log(pE) ~ log(mRNA)                                                                                                   | 0.3925         |
| log(pE) ~ log(Length) + (5' cap folding energy)                                                                       | 0.3262         |
| log(pE) ~ log(mRNA) + (5' cap folding energy)                                                                         | 0.448          |
| log(pE) ~ log(Length) + log(mRNA) +(5' cap folding energy)                                                            | 0.5521         |
| log(pE) ~ log(Length) + log(mRNA) + (5' cap folding energy) + (5' UTR length)                                         | 0.5604         |
| log(pE) ~ log(Length) + log(mRNA) + (5' cap folding energy) + (5' UTR length) + (# uATGs)                             | 0.5658         |
| log(pE) ~ log(Length) + log(mRNA) + (5' cap folding energy) + (5' UTR length) + (# uATGs) + (UTR GC)                  | 0.5675         |
| log(pE) ~ log(Length) + log(mRNA) + (5' cap folding energy) + (5' UTR length) + (# uATGs presence/absence)            | 0.5784         |
| log(pE) ~ log(Length) + log(mRNA) + (5' cap folding energy) + (5' UTR length) + (# uATGs presence/absence) + (UTR GC) | 0.5812         |
